# Supplementary material for: Poly (N-isopropylacrylamide)-co-(acrylic acid) microgel/Ag nanoparticle hybrids for the colorimetric sensing of H2O2
Source: Royal Society of Chemistry journal article supplement (doi:10.1039/c4nr06093h), 2015-01-01
Supplement: c4nr06093h1.pdf [file c4nr06093h1.pdf]

## Supporting Information

### **Poly (N-Isopropylacrylamide)-co-(Acrylic Acid) Microgel/Ag Nanoparticle Hybrids for the Colorimetric Sensing of H<sub>2</sub>O<sub>2</sub>**

De-Man Han<sup>†,‡</sup>, Qiang Matthew Zhang<sup>†</sup>, and Michael J. Serpe <sup>\*,†</sup>

<sup>†</sup> Department of Chemistry, University of Alberta, Edmonton, Alberta, Canada T6G 2G2

<sup>‡</sup> Department of Chemistry, Taizhou University, Taizhou, China 318000

*E-mail: michael.serpe@ualberta.ca; Fax: +1 780 492 8231; Tel: +1 780 492 5778.*

*hdm@tzc.edu.cn; Fax: +86 576 88660353; Tel: +86 576 88660353*

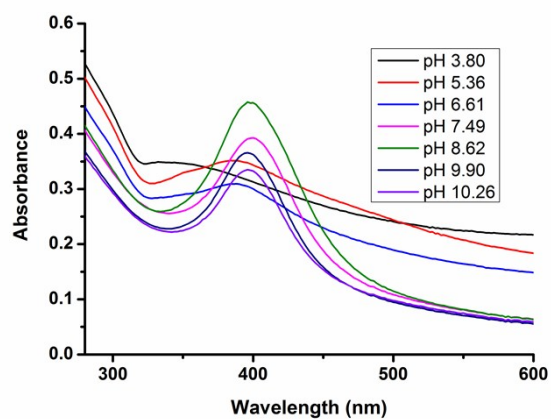

**Figure S1.** The effect of Ag NP synthesis solution pH on the optical properties of the resultant pNIPAm-co-AAc/Ag NP hybrid microgels. As can be seen, the optimal synthesis pH was 8.62.

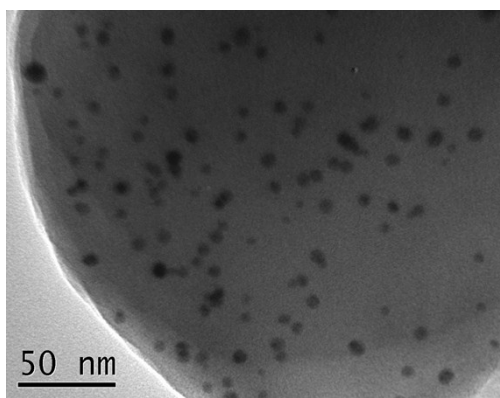

**Figure S2.** TEM image of Ag NPs in the hybrid microgels. The microgel network contained Ag NPs with diameters of  $\sim 5$  nm.

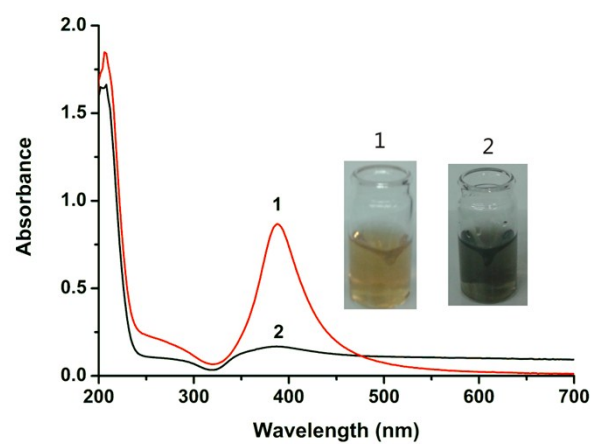

**Figure S3.** UV-Vis absorption spectra of the Ag NPs prepared without adding pNIPAm-co-AAc microgels. 1. Fresh Ag NPs, 2. Ag NPs stored after 5 minutes.
